# Supplementary material for: Exploring Covalent Docking Mechanisms of Boron-Based Inhibitors to Class A, C and D β-Lactamases Using Time-dependent Hybrid QM/MM Simulations
Source: Frontiers journal article supplement (doi:10.3389/fmolb.2021.633181), 2021-08-09
Supplement: Data_Sheet_2.PDF [file Data_Sheet_2.PDF]

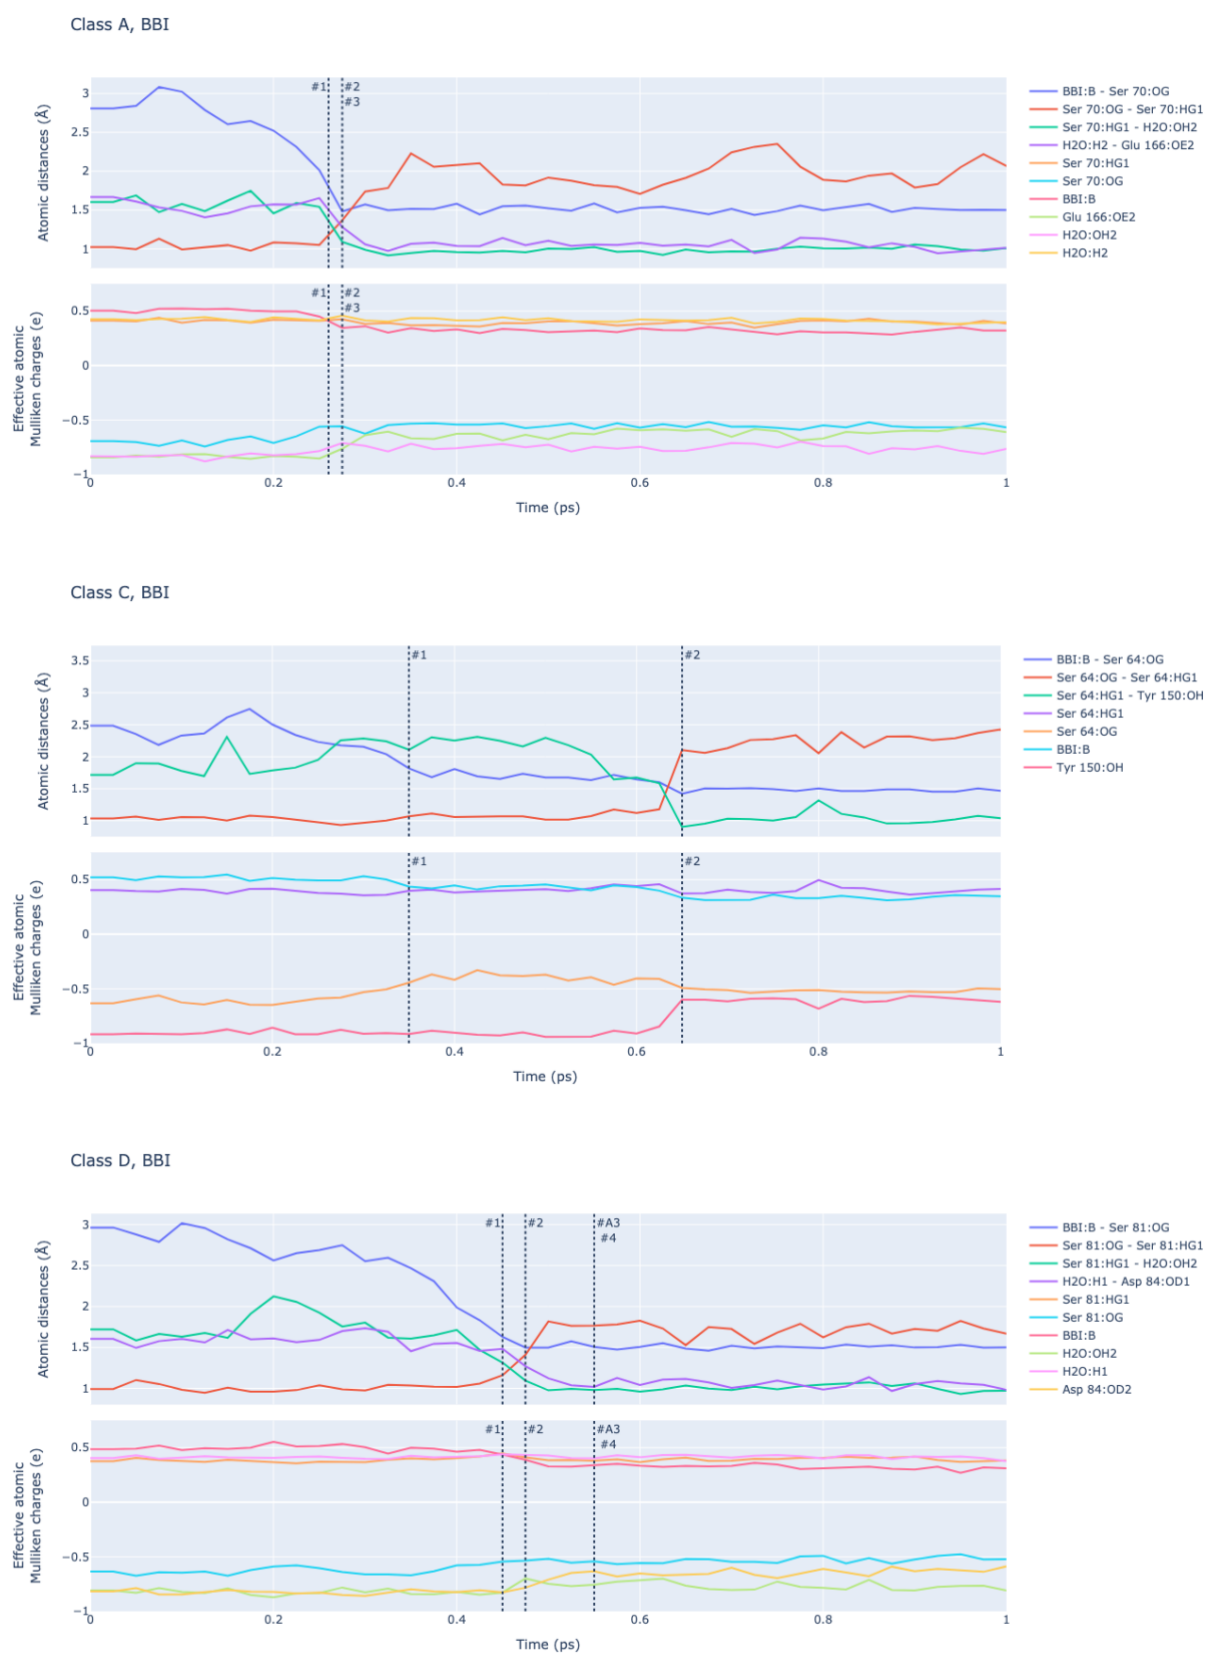

**Figure S2.** Atomic distances (upper subplots), and effective Mulliken atomic charges (lower subplots) of atoms directly involved in the reaction pathway, presented for BBI docked to  $\beta$ -lactamases which

belong to the A, C, and D classes, respectively. The simulation results in the plots are based on the “first simulation” described in **Table 2**. The reaction steps, marked with vertical dashed lines, correspond to denotations in **Table 2** and in **Figure 7**.
